# Supplementary material for: CdS:Co diluted magnetic semiconductor nanocrystals: synthesis and ferromagnetism study
Source: Royal Society of Chemistry journal article supplement (doi:10.1039/c1ce05593c), 2011-01-01
Supplement: c1ce05593c.pdf [file c1ce05593c.pdf]

Supplementary Information for:

**CdS:Co Diluted Magnetic Semiconductor Nanocrystals: Synthesis and  
ferromagnetism Study**

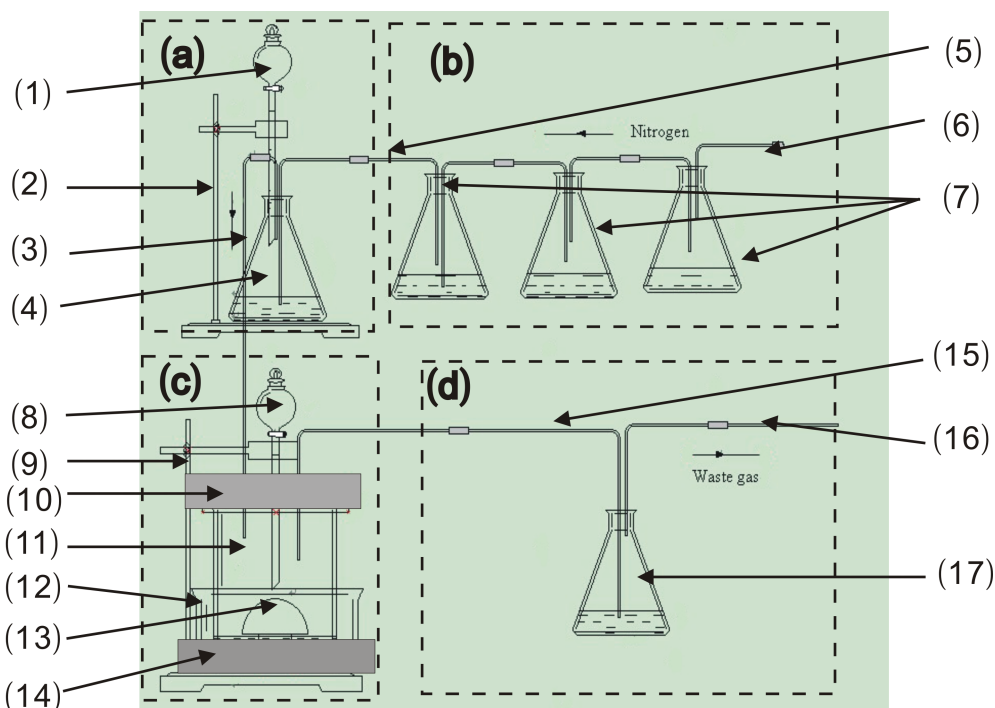

Figure S. The whole experiment includes four sections:

(a) Preparing H<sub>2</sub>S gas:

(1) separatory funnel: filled with HCL; (2) prop stand with clip; (3) catheter; (4) flask: filled with Na<sub>2</sub>S

(b) Three-stage voltage divider used for leading in nitrogen:

(5) (6) catheter; (7) flask: filled with H<sub>2</sub>O

(c) Gas liquid reaction:

(8) separatory funnel: filled with reactant (Cd (COOCH<sub>3</sub>)<sub>2</sub>, Co (COOCH<sub>3</sub>)<sub>2</sub>, PVP, deionized water); (9) prop stand with clip; (10) hermetic lid; (11) catalyst case; (12) thermostat; (13) frosting spherical crown; (14) supersonic instrument

(d) Collecting exhaust gases:

(15) (16) catheter; (17) flask: filled with NaOH

The reaction process as followed:

HCL drips from (1) into (4) reacting with  $\text{Na}_2\text{S}$  to prepare  $\text{H}_2\text{S}$  gas. Nitrogen passes through three-stage voltage divider into (4) then carries the  $\text{H}_2\text{S}$  flow into (11) through (3). When  $\text{H}_2\text{S}$  flows into (11), the reactant solution drops into (11) evenly and overspreads (13). Then  $\text{H}_2\text{S}$  and reactant reaction takes place. With the reaction carrying on, the products dripping from (13). Avoid the nanocrystals reuniteing, the whole core part of the reaction was put in (14). The waste gas through (15) flows into (17) then be exhaled.
